# Supplementary material for: Anesthetic Agents and Cardiovascular Outcomes of Noncardiac Surgery after Coronary Stent Insertion
Source: MDPI journal article supplement (doi:10.3390/jcm9020429), 2020-02-05
Supplement: s1 [file s1]

# Anesthetic Agents and Major Adverse Cardiovascular and Cerebral Event after Noncardiac Surgery in Patients with Coronary Stent Implantation

## : Supplemental Materials

| Number                         | Title                                                                                                                                                                                            | Page |
|--------------------------------|--------------------------------------------------------------------------------------------------------------------------------------------------------------------------------------------------|------|
| <b>Supplemental Figure S1.</b> | Histogram and covariate balance plot of distribution of propensity scores between patients with total intravenous anesthesia and sevoflurane.                                                    | 2    |
| <b>Supplemental Figure S2.</b> | Histogram and covariate balance plot of distribution of propensity scores between patients with total intravenous anesthesia and desflurane.                                                     | 3    |
| <b>Supplemental Figure S3.</b> | Histogram and covariate balance plot of distribution of propensity scores between patients with sevoflurane and desflurane.                                                                      | 4    |
| <b>Supplemental Table S1.</b>  | Comparisons of major adverse cardiovascular and cerebral event and major bleeding between patients with total intravenous anesthesia and sevoflurane before and after propensity score matching. | 5    |
| <b>Supplemental Table S2.</b>  | Comparisons of major adverse cardiovascular and cerebral event and major bleeding between patients with total intravenous anesthesia and desflurane before and after propensity score matching.  | 6    |
| <b>Supplemental Table S3.</b>  | Comparisons of major adverse cardiovascular and cerebral event and major bleeding between patients with sevoflurane and desflurane before and after propensity score matching.                   | 7    |

**Supplemental Figure S1.** Histogram and covariate balance plot of distribution of propensity scores between patients with total intravenous anesthesia and sevoflurane.

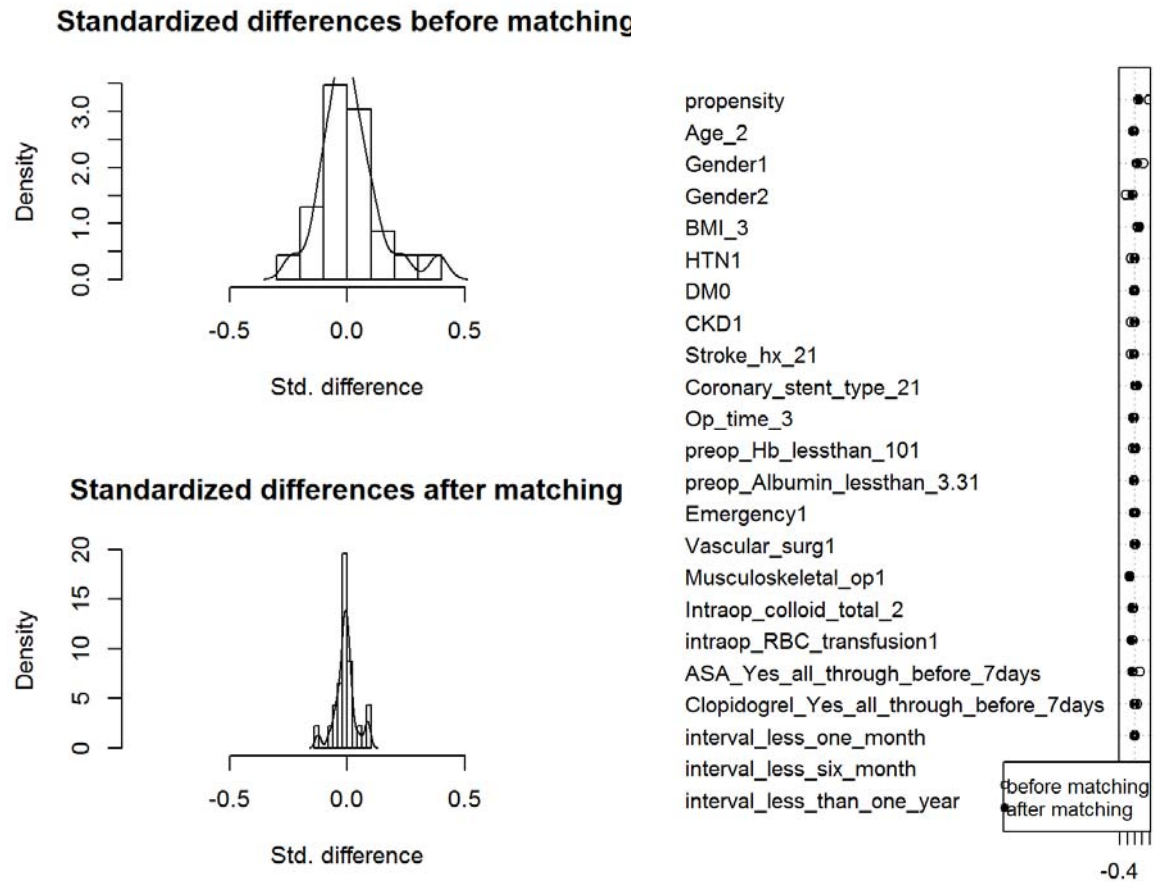

**Supplemental Figure S2.** Histogram and covariate balance plot of distribution of propensity scores between patients with total intravenous anesthesia and desflurane.

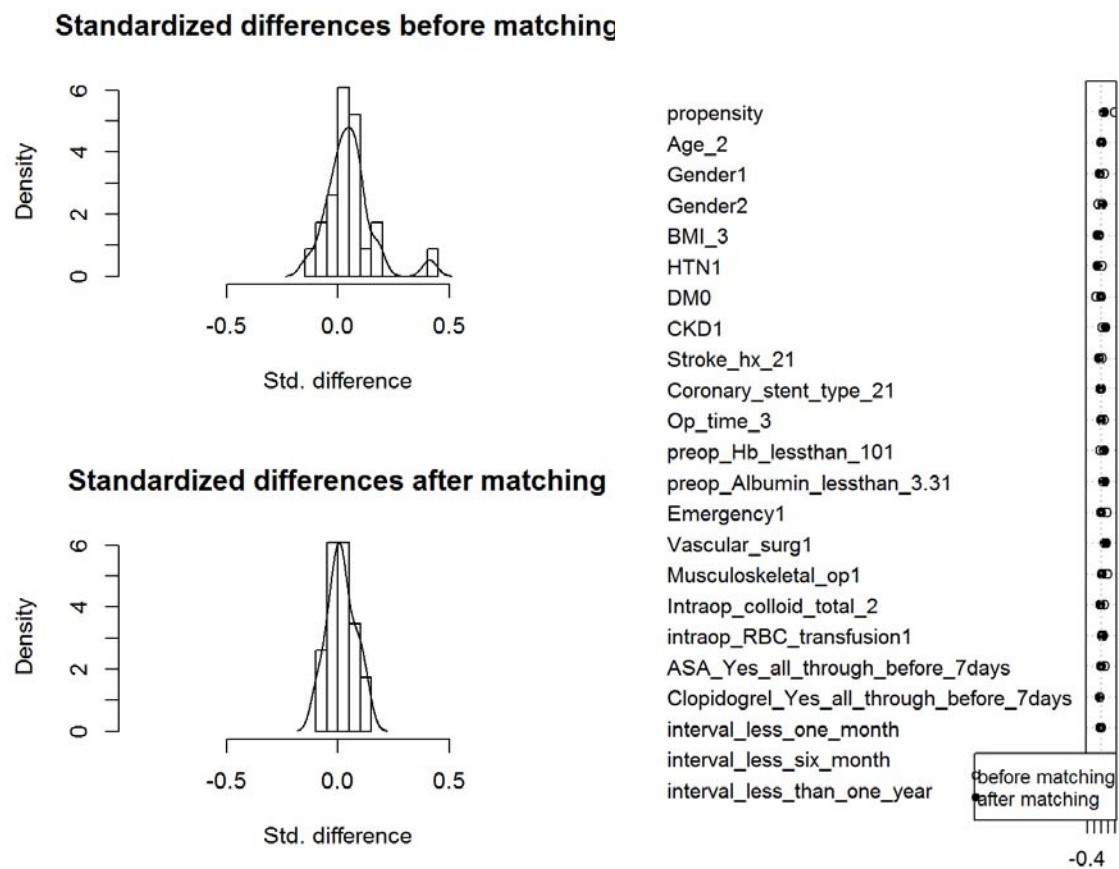

**Supplemental Figure S3.** Histogram and covariate balance plot of distribution of propensity scores between patients with sevoflurane and desflurane.

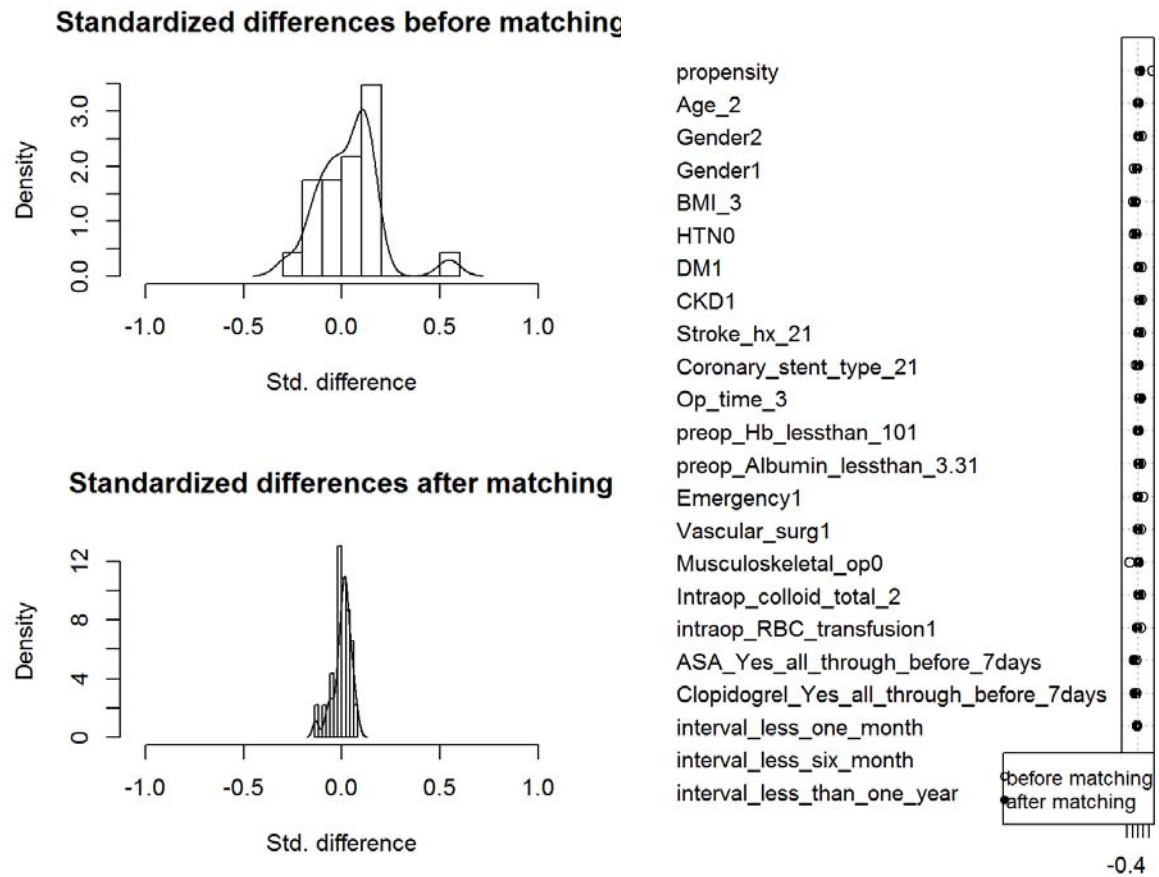

**Supplemental Table S1.** Comparisons of major adverse cardiovascular and cerebral event and major bleeding between patients with total intravenous anesthesia and sevoflurane before and after propensity score matching.

| Characteristics                 | Before matching |                 |                 | After matching  |                 |                 |
|---------------------------------|-----------------|-----------------|-----------------|-----------------|-----------------|-----------------|
|                                 | TIVA<br>(n=975) | SEVO<br>(n=439) | <i>P</i> -value | TIVA<br>(n=428) | SEVO<br>(n=428) | <i>P</i> -value |
| MACCE                           | 50 (5.1)        | 36 (8.2)        | 0.006           | 28 (6.5)        | 33 (7.7)        | 0.507           |
| Fatal myocardial infarction     | -               | -               | -               | -               | -               | -               |
| Non-fatal myocardial infarction | 42 (4.3)        | 22 (5.0)        | 0.556           | 24 (5.6)        | 20 (4.7)        | 0.536           |
| Pulmonary embolism              | 2 (0.2)         | 7 (1.6)         | 0.005           | 0 (0.0)         | 7 (1.6)         | 0.015           |
| Non-hemorrhagic stroke          | 6 (0.6)         | 7 (1.6)         | 0.127           | 4 (0.9)         | 6 (1.4)         | 0.752           |
| Coronary revascularization      | 6 (0.6)         | 1 (0.2)         | 0.447           | 3 (0.7)         | 1 (0.2)         | 0.624           |
| Major bleeding                  | 35 (3.6)        | 24 (5.5)        | 0.102           | 13 (3.0)        | 23 (5.4)        | 0.125           |

Data are presented as number (%).

TIVA, total intravenous anesthesia; SEVO, sevoflurane; MACCE, major adverse cardiovascular and cerebral event.

**Supplemental Table S2.** Comparisons of major adverse cardiovascular and cerebral event and major bleeding between patients with total intravenous anesthesia and desflurane before and after propensity score matching.

| Characteristics                 | Before matching |                |                 | After matching  |                |                 |
|---------------------------------|-----------------|----------------|-----------------|-----------------|----------------|-----------------|
|                                 | TIVA<br>(n=975) | DES<br>(n=216) | <i>P</i> -value | TIVA<br>(n=215) | DES<br>(n=215) | <i>P</i> -value |
| MACCE                           | 50 (5.1)        | 11 (5.1)       | 0.983           | 13 (6.0)        | 11 (5.1)       | 0.674           |
| Fatal myocardial infarction     | -               | -              | -               | -               | -              | -               |
| Non-fatal myocardial infarction | 42 (4.3)        | 8 (3.7)        | 0.851           | 10 (4.7)        | 8 (3.7)        | 0.811           |
| Pulmonary embolism              | 2 (0.2)         | 2 (0.9)        | 0.153           | 2 (0.9)         | 2 (0.9)        | 0.999           |
| Non-hemorrhagic stroke          | 6 (0.6)         | 1 (0.5)        | 0.999           | 1 (0.5)         | 1 (0.5)        | 0.999           |
| Coronary revascularization      | 6 (0.6)         | 1 (0.5)        | 0.999           | 1 (0.5)         | 1 (0.5)        | 0.999           |
| Major bleeding                  | 35 (3.6)        | 6 (2.8)        | 0.682           | 6 (2.8)         | 6 (2.8)        | 0.999           |

Data are presented as number (%).

TIVA, total intravenous anesthesia; DES, desflurane; MACCE, major adverse cardiovascular and cerebral event.

**Supplemental Table S3.** Comparisons of major adverse cardiovascular and cerebral event and major bleeding between patients with sevoflurane and desflurane before and after propensity score matching.

| Characteristics                 | Before matching |                |                 | After matching  |                |                 |
|---------------------------------|-----------------|----------------|-----------------|-----------------|----------------|-----------------|
|                                 | SEVO<br>(n=439) | DES<br>(n=216) | <i>P</i> -value | SEVO<br>(n=210) | DES<br>(n=210) | <i>P</i> -value |
| MACCE                           | 36 (8.2)        | 11 (5.1)       | 0.147           | 10 (4.8)        | 11 (5.2)       | 0.823           |
| Fatal myocardial infarction     | -               | -              | -               | -               | -              | -               |
| Non-fatal myocardial infarction | 22 (5.0)        | 8 (3.7)        | 0.553           | 7 (3.3)         | 8 (3.8)        | 0.999           |
| Pulmonary embolism              | 7 (1.6)         | 2 (0.9)        | 0.725           | 1 (0.5)         | 2 (1.0)        | 0.999           |
| Non-hemorrhagic stroke          | 7 (1.6)         | 1 (0.5)        | 0.282           | 2 (1.0)         | 1 (0.5)        | 0.999           |
| Coronary revascularization      | 1 (0.2)         | 1 (0.5)        | 0.551           | 1 (0.5)         | 1 (0.5)        | 0.999           |
| Major bleeding                  | 24 (5.5)        | 6 (2.8)        | 0.163           | 5 (2.4)         | 6 (2.9)        | 0.999           |

Data are presented as number (%).

SEVO, sevoflurane; DES, desflurane; MACCE, major adverse cardiovascular and cerebral event.
